# Supplementary material for: Tailoring photodetection performance of self-powered Ga2O3 UV solar-blind photodetectors through asymmetric electrodes
Source: Royal Society of Chemistry journal article supplement (doi:10.1039/d3tc00387f), 2023-01-01
Supplement: d3tc00387f1.pdf [file d3tc00387f1.pdf]

## Supplementary data

### **Tailoring photodetection performance of self-powered Ga<sub>2</sub>O<sub>3</sub> UV solar-blind photodetectors through asymmetric electrodes**

Keyun Gu<sup>1</sup>, Zilong Zhang<sup>2, \*</sup>, Haofei Huang<sup>1</sup>, Ke Tang<sup>1</sup>, Jian Huang<sup>1,3, \*</sup>, Meiyong Liao<sup>2</sup>,

Linjun Wang<sup>1,3</sup>

<sup>1</sup> School of Materials Science and Engineering, Shanghai University, Shanghai 200444, PR  
China

<sup>2</sup> Research Center for Functional Materials, National Institute for Materials Science (NIMS),  
Namiki 1-1, Tsukuba, Ibaraki 305-0044, Japan

<sup>3</sup> Zhejiang Institute of Advanced Materials, SHU, Jiashan 314113, PR China

Correspondence should be addressed to Zilong Zhang ([zlzhang16@hotmail.com](mailto:zlzhang16@hotmail.com) or  
[ZHANG.Zilong@nims.go.jp](mailto:ZHANG.Zilong@nims.go.jp)),

Jian Huang ([jianhuang@shu.edu.cn](mailto:jianhuang@shu.edu.cn)).

**1. Transient photo-response of the self-powered UV photodetectors kept in the atmosphere for two months.**

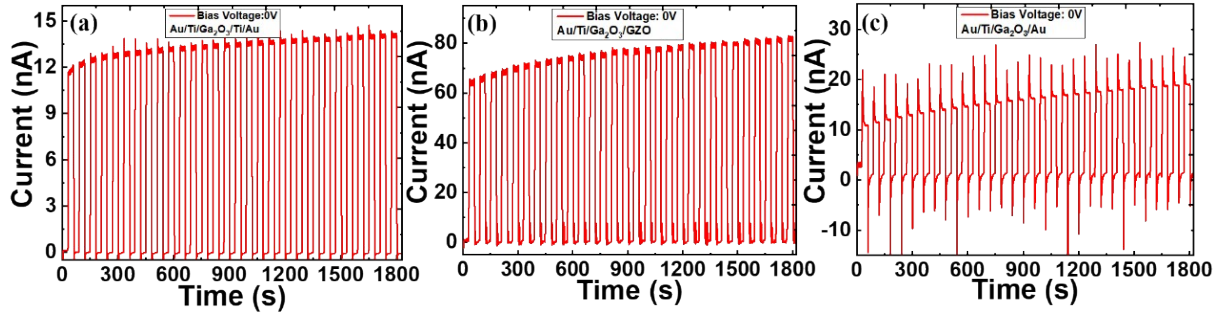

Fig. S1. Transient response of the amorphous Ga<sub>2</sub>O<sub>3</sub> thin film photodetectors measured after placed in an atmospheric environment for two months (a) Asymmetric-electrode-size photodetector Au/Ti/Ga<sub>2</sub>O<sub>3</sub>/Ti/Au and Asymmetric-electrode-material photodetector (b) Au/Ti/Ga<sub>2</sub>O<sub>3</sub>/GZO (c) Au/Ti/Ga<sub>2</sub>O<sub>3</sub>/Au

The self-powered photodetectors were kept in the atmosphere. Fig. S1 shows the transient response performances of the amorphous Ga<sub>2</sub>O<sub>3</sub> thin film photodetectors exposed to the atmosphere for two months. The current increased and decreased with the light turn on and off. It shows that these detectors have high-stability and high-repeatability of detection performances. All the self-powered detectors fabricated in this work show a promising potential to be applied in the long-time working applications in the harsh environment.

## 2. Calculation of the Schottky barrier heights of an asymmetric-electrode-size photodetector between electrodes and Ga<sub>2</sub>O<sub>3</sub> thin films.

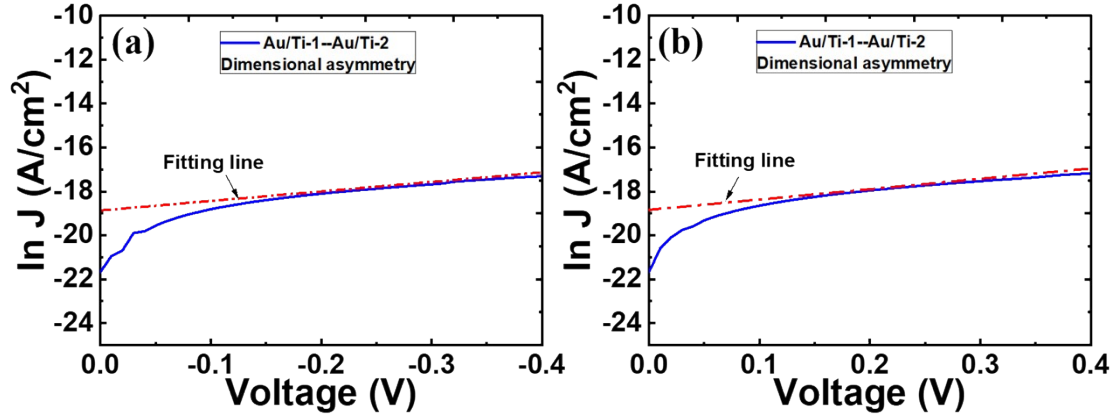

Fig. S2. The fitting of the linear region of the  $\ln(J)$ - $V$  characteristics for an asymmetric-electrode-size photodetector. (a) Reverse voltage; (b) Forward voltage

The two-side Schottky barrier height of an asymmetric-electrode-size photodetector can be calculated as

$$J_s = A^* T^2 \exp(-q\phi_B / kT) \quad (1)$$

where  $J_s$  is the saturation current density of the device,  $k$  is Boltzmann's constant,  $T$  is the evaluated temperature, and  $e$  is the electron charge. The  $\ln J_s$  can be obtained through the intercept of tangent line of each  $\ln J$ - $V$  curve, as shown in Fig. S2. Based on the Eq. (1), the  $q\Phi_{BH} = (k_B T)[\ln T^2 A^* - \ln J_s]$ . Thus, the  $q\Phi_{BH}$  of Ga<sub>2</sub>O<sub>3</sub> with left and right electrodes are calculated as values of 0.880 eV and 0.879 eV, respectively, indicating the heights of the Schottky barrier on both sides are almost equal.

### 3. Calculation of the Schottky barrier heights of asymmetric-electrode-material photodetectors between two-side metal electrode and $\text{Ga}_2\text{O}_3$ thin film.

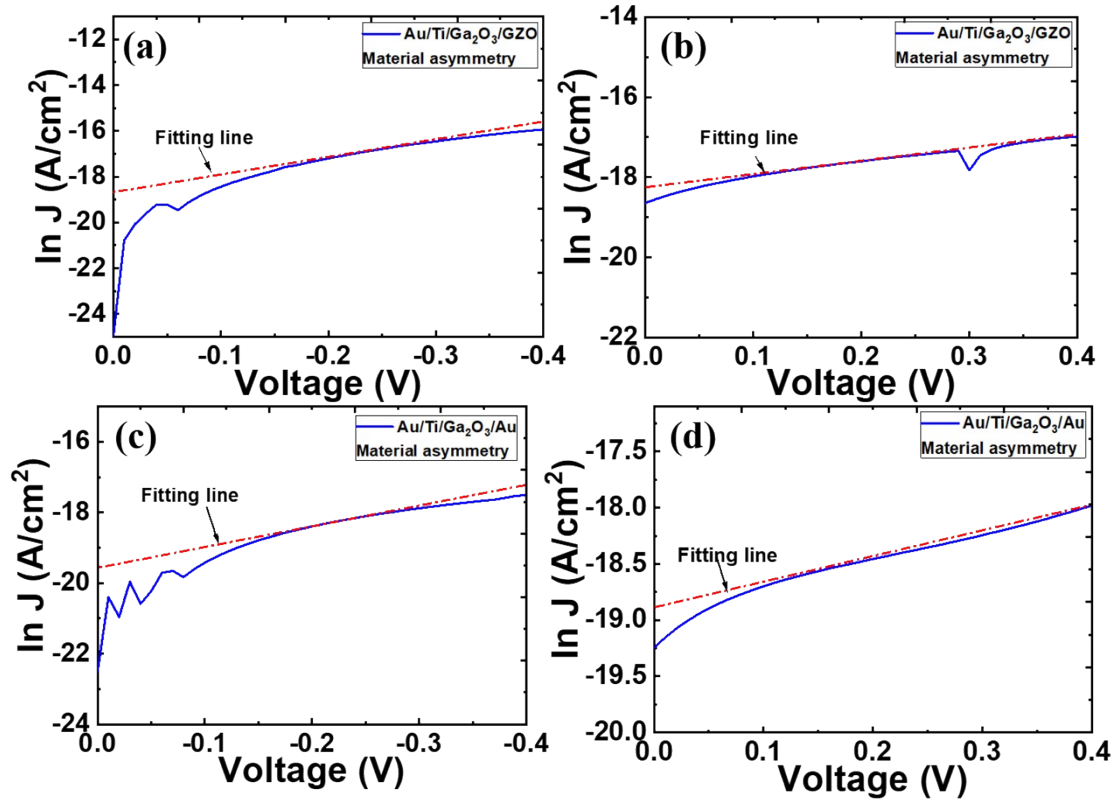

Fig. S3. The fitting of the linear region of the  $\ln(J)$ - $V$  characteristics for the Au/Ti/Ga<sub>2</sub>O<sub>3</sub>/GZO photodetector and the Au/Ti/Ga<sub>2</sub>O<sub>3</sub>/Au photodetector. (a) and (c) Reverse voltage; (b) and (d) Forward voltage.

Based on the Eq. (1), the  $q\Phi_{B1}$  between the Ga<sub>2</sub>O<sub>3</sub> and the Au/Ti, the  $q\Phi_{B2}$  between the Ga<sub>2</sub>O<sub>3</sub> and the GZO, and the  $q\Phi_{B3}$  between the Ga<sub>2</sub>O<sub>3</sub> and the Au are calculated as values of 0.880 eV, 0.863 eV and 0.898 eV, respectively.
